# Supplementary material for: The mechanism of improved thermal stability of protein-enriched O/W emulsions by soy protein particles
Source: Royal Society of Chemistry journal article supplement (doi:10.1039/c9fo02270h), 2019-12-30
Supplement: c9fo02270h1.pdf [file c9fo02270h1.pdf]

**Figure S1**

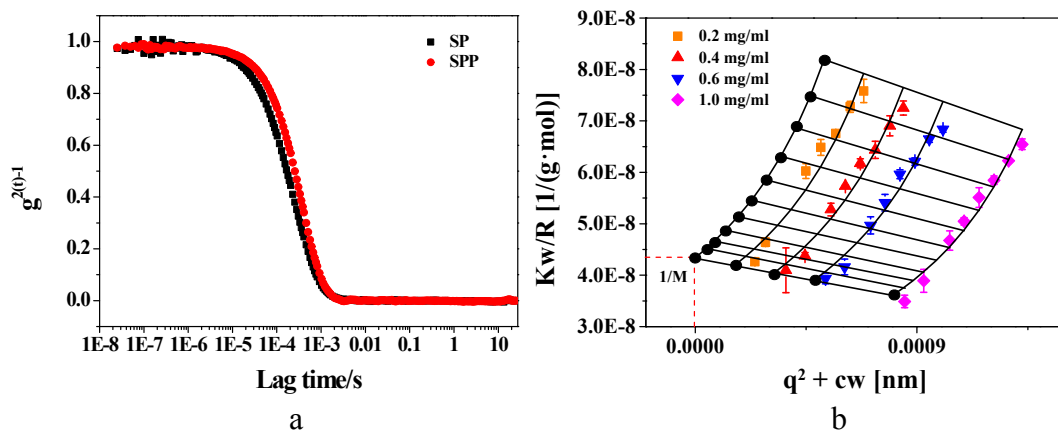

**Figure S1.** a, autocorrelation function obtained for dispersions of SP and SPP at the scattering angle  $90^\circ$ . b, zimm plots of SPP in 10 mM pH 7.0 PBS at  $25^\circ\text{C}$ .
